# Supplementary material for: A 32 kb Critical Region Excluding Y402H in CFH Mediates Risk for Age-Related Macular Degeneration
Source: PLoS One. 2011 Oct 12;6(10):e25598. doi: 10.1371/journal.pone.0025598 (PMC3192039; doi:10.1371/journal.pone.0025598)
Supplement: Table S3 — Frequency distribution of variations at CNP147 and CNP148 in different reference populations. (XLS) [file pone.0025598.s014.xls]

## Sheet: Sheet1
Table S3. Frequency distribution of variations at CNP147 and CNP148 in different reference populations
Population	No.of Samples	CNP147				CNP148
		3 copies	2 copies	1 Copy	0 Copy	4 copies	3 copies	2 copies	1 copy	0 copy
HapMap
CEU	60	-	0.6	0.316667	0.0833333		0.0166667	0.983333
CHB	45	-	0.822222	0.177778	-			0.933333	0.0666667
JPT	45	-	0.866667	0.133333	-			0.955556	0.0444444
YRI	60	-	0.183333	0.533333	0.283333			0.933333	0.05	0.0166667
Coriell Diversity Panel
African American	100		0.43	0.4	0.17			0.93	0.07
Caucasian	100		0.64	0.32	0.04
Chinese	100	0.01	0.9	0.09	-		0.01	0.94	0.05
Mexican	100	0.01	0.73	0.26	-
HapMap Phase III
CEU	59	-	0.59322	0.389831	0.0169492
TSI	90	-	0.566667	0.377778	0.0555556			0.988889	0.0111111
GIH	90	-	0.422222	0.388889	0.188889			0.944444	0.0555556
MEX	55	-	0.781818	0.2	0.0181818			0.981818	0.0181818
CHB	45	-	0.866667	0.133333	-			0.888889	0.111111
CHD	50	-	0.86	0.14	-			0.96	0.04
JPT	46	-	0.934783	0.0652174	-		0.0217391	0.956522	0.0217391
ASW	53	-	0.415094	0.490566	0.0943396			0.962264	0.0377358
LWK	52	-	0.384615	0.423077	0.192308	0.0192308	0.0576923	0.865385	0.0576923
MKK	149	-	0.557047	0.409396	0.033557			0.993289	0.00671141
YRI	60	-	0.2	0.533333	0.266667			0.933333	0.0666667
This table lists the frequencies of copy numbers at CNP147 and CNP148 regions in different reference populations.
* NA18870 with 1 copy for CNP147 and 0 copy for CNP 148
CEU	Utah residents with Northern and Western European ancestry from the CEPH collection
CHB	Han Chinese in Beijing, China
CHD	Chinese in Metropolitan Denver, Colorado
GIH	Gujarati Indians in Houston, Texas
JPT	Japanese in Tokyo, Japan
LWK	Luhya in Webuye, Kenya
MEX	Mexican ancestry in Los Angeles, California
MKK	Maasai in Kinyawa, Kenya
TSI	Toscans in Italy
YRI	Yoruba in Ibadan, Nigeria
ASW	African ancestry in Southwest USA
-	None observed
