# Supplementary material for: A 32 kb Critical Region Excluding Y402H in CFH Mediates Risk for Age-Related Macular Degeneration
Source: PLoS One. 2011 Oct 12;6(10):e25598. doi: 10.1371/journal.pone.0025598 (PMC3192039; doi:10.1371/journal.pone.0025598)
Supplement: Table S5 — Meta-analysis SNPs located in the 32 kb critical region. (XLS) [file pone.0025598.s016.xls]

## Sheet: Sheet1
Table S5. Meta-analysis SNPs located in the 32 kb critical region
		Located within Segmental Duplication	Custom Illumina1,2				AREDS Cohort2				MPM Panel2				Meta-Analysis
SNP	BP		Freq. Cases	Freq. Controls	OR	p= value	Freq. Cases	Freq. Controls	OR	p= value	Freq. Cases	Freq. Controls	OR	p= value	OR	CI- low	CI-high	p-value
rs9970784	194940425	Yes	0.3299	0.1464	0.542545	1.98 x 10-30	0.3227	0.6303	0.3042	1.14 x 10-17	0.3562	0.6135	0.3408	3.67 x 10-71	0.429998	0.398814	0.463619	5.25 x 10-107
rs1831282	194940616	Yes	0.3959	0.5917	0.43831	2.48 x 10-44	0.3227	0.6303	0.3042	1.14 x 10-17	0.3562	0.6135	0.3408	3.67 x 10-71	0.379713	0.350813	0.410993	5.00 x 10-127
rs203687	194940893	Yes	0.6005	0.3999	0.431039	2.00 x 10-46	0.3227	0.6303	0.3042	1.14 x 10-17	0.3562	0.6135	0.3408	3.67 x 10-71	0.376936	0.348298	0.40793	2.17 x 10-129
rs2019727	194941337	Yes	0.3585	0.4916	0.638736	2.51 x 10-21	0.08546	0.2314	0.3296	1.27 x 10-9	0.09484	0.2074	0.4052	2.41 x 10-30	0.552184	0.510954	0.596742	7.41 x 10-51
rs2019724	194941540	Yes	0.599	0.4004	0.445982	3.39 x 10-43	0.3227	0.6303	0.3042	1.14 x 10-17	0.3554	0.613	0.341	2.86 x 10-71	0.383278	0.354225	0.414714	1.15 x 10-125
rs1887973	194941802	Yes	0.5838	0.3917	0.445798	1.71 x 10-41	0.3227	0.6303	0.3042	1.14 x 10-17	0.3554	0.613	0.341	2.86 x 10-71	0.382033	0.352795	0.413695	4.88 x 10-124
rs6428357	194942194	Yes	0.5972	0.3961	0.439851	1.33 x 10-44	0.3227	0.6303	0.3042	1.14 x 10-17	0.3554	0.613	0.341	2.86 x 10-71	0.38077	0.351903	0.412005	2.51 x 10-127
rs6695321	194942484	Yes	0.2884	0.3884	0.645378	7.48 x 10-14	0.2385	0.3989	0.5282	7.53 x 10-7	0.2606	0.4057	0.5091	1.27 x 10-29	0.569981	0.527234	0.616195	2.37 x 10-45
rs10733086	194943558	Yes	0.399	0.6004	0.432979	8.93 x 10-46	0.3227	0.6303	0.3042	1.14 x 10-17	0.3554	0.613	0.341	2.86 x 10-71	0.377689	0.348984	0.408755	8.79 x 10-129
rs1410997	194943786	Yes	0.3972	0.5942	0.44071	4.04 x 10-44	0.3227	0.6303	0.3042	1.14 x 10-17	0.3554	0.6126	0.3416	4.78 x 10-71	0.381248	0.352302	0.412572	1.28 x 10-126
rs203685	194944568	Yes	0.3961	0.596	0.427514	3.66 x 10-47	0.3227	0.6303	0.3042	1.14 x 10-17	0.3554	0.6126	0.3416	4.78 x 10-71	0.375766	0.347213	0.406666	3.57 x 10-130
rs10737680	194946078	Yes	0.2335	0.437	0.381976	1.13 x 10-51	0.1747	0.4255	0.2948	1.52 x 10-15	0.1991	0.4343	0.3156	5.51 x 10-71	0.343168	0.315113	0.373719	2.09 x 10-133
rs1831281	194947437	Yes	0.1204	0.2104	0.440376	3.03 x 10-22	0.09056	0.1941	0.4319	6.79 x 10-6	0.1042	0.2274	0.3859	1.26 x 10-34	0.411752	0.369924	0.458309	2.84 x 10-59
rs203674	194951248	No	0.3985	0.5973	0.436261	4.91 x 10-45	0.3253	0.641	0.2966	2.73 x 10-18	0.3551	0.6126	0.3415	4.28 x 10-71	0.378532	0.349767	0.409662	3.02 x 10-128
rs3753395	194953275	No	0.2312	0.4309	0.377752	7.99 x 10-51	0.1747	0.4255	0.2948	1.52 x 10-15	0.1991	0.4343	0.3156	5.51 x 10-71	0.340741	0.312636	0.371372	1.05 x 10-132
rs6677604	194953541	No	0.1131	0.2174	0.48363	9.17 x 10-22	0.08418	0.2314	0.3243	8.57 x 10-10	0.09484	0.2074	0.4054	2.56 x 10-30	0.433118	0.390856	0.47995	1.96 x 10-57
rs10489456	194954138	No	0.1657	0.1613	0.94779	0.478	0.1467	0.2048	0.6779	0.015	0.1561	0.1783	0.8538	0.03	0.873708	0.792499	0.963239	6.67 x 10-3
rs10922106	194958087	No	0.2338	0.4373	0.38321	2.46 x 10-51	0.1747	0.4255	0.2948	1.52 x 10-15	0.1991	0.4343	0.3156	5.51 x 10-71	0.343684	0.315588	0.374282	4.94 x 10-133
rs11801630	194958771	No	0.1655	0.161	0.947297	0.478	0.148	0.2048	0.6857	0.017	0.1561	0.1783	0.8538	0.03	0.873428	0.792029	0.963193	6.70 x 10-3
rs393955	194959093	No	0.5982	0.3994	0.442008	9.27 10-44	0.324	0.6303	0.3051	1.44 x 10-17	0.3551	0.6126	0.3415	4.28 x 10-71	0.381791	0.352794	0.41317	3.62 x 10-126
rs381974	194959295	No	0.392	0.5858	0.428102	8.50 10-45	0.324	0.6303	0.3051	1.44 x 10-17	0.3551	0.6126	0.3415	4.28 x 10-71	0.374917	0.346109	0.406123	8.23 x 10-128
rs3753396	194962365	No	0.1796	0.1769	0.908755	0.201	0.148	0.2048	0.6857	0.017	0.1561	0.1783	0.8538	0.03	0.858756	0.779305	0.946307	2.11 x 10-3
rs403846	194963360	No	0.4	0.5986	0.439982	2.31 x 10-44	0.324	0.6303	0.3051	1.44 x 10-17	0.3551	0.6126	0.3415	4.28 x 10-71	0.381047	0.352127	0.412343	7.54 x 10-127
rs419137	194963498	No	0.175	0.1385	1.44607	3.35 x 10-06	0.04974	0.02128	2.51	0.022	0.167	0.1078	1.683	4.26 x 10-10	1.56926	1.40366	1.7544	2.38 x 10-15
rs1410996	194963556	No	0.2327	0.435	0.385503	7.32 x 10-51	0.176	0.4255	0.297	2.09 x 10-15	0.1991	0.4343	0.3156	5.51 x 10-71	0.344893	0.316718	0.375574	2.27 x 10-132
rs395544	194964895	No	0.4003	0.5991	0.441357	2.85 10-44	0.324	0.6303	0.3051	1.44 x 10-17	0.3551	0.6126	0.3415	4.28 x 10-71	0.381749	0.352811	0.41306	1.08 x 10-126
rs1576340	194965334	No	0.1168	0.2153	0.460978	1.83 x 10-23	0.09056	0.1915	0.4346	9.39 x 10-6	0.1045	0.2278	0.3852	1.02 x 10-34	0.422427	0.38099	0.468372	3.73 x 10-60
rs12144939	194965568	No	0.1101	0.212	0.471176	1.01 x 10-22	0.08546	0.2314	0.3296	1.27 x 10-9	0.09458	0.207	0.4059	3.26 x 10-30	0.428015	0.386029	0.474568	2.18 x 10-58
rs11799595	194966945	No	0.167	0.1639	0.942026	0.43	0.148	0.2048	0.6857	0.017	0.1563	0.1783	0.8552	0.031	0.872389	0.791317	0.961768	6.08 x 10-3
rs380390	194967674	No	0.4003	0.5973	0.445416	2.12 x 10-43	0.3278	0.641	0.3012	5.27 x 10-18	0.3551	0.6126	0.3415	4.28 x 10-71	0.382995	0.353981	0.414387	5.18 x 10-126
rs7540032	194967907	No	0.2345	0.4363	0.387006	2.44 x 10-50	0.176	0.4255	0.297	2.09 x 10-15	0.1988	0.4343	0.3152	4.29 x 10-71	0.345286	0.317059	0.376026	6.70 x 10-132
rs2284664	194969148	No	0.1265	0.2294	0.480102	2.52 x 10-22	0.09056	0.1941	0.4319	6.79 x 10-6	0.1042	0.2274	0.3859	1.26 x 10-34	0.431723	0.389915	0.478013	9.08 x 10-59
rs1329428	194969433	No	0.2332	0.4342	0.385555	1.77 x 10-50	0.176	0.4255	0.297	2.09 x 10-15	0.1991	0.4343	0.3159	6.57 x 10-71	0.344919	0.316698	0.375656	6.34 x 10-132
Genotypes of untyped SNPs in custom illumina panel. AREDS (GWAS) and MPM panel were imputed using HapMap CEU as reference. The logistic regression analysis was conducted on the imputed genotype data using age and sex as covariates.
1results obtained from meta-analysis of individual cohorts in the custom Illumina panel
2Imputed data
