# Supplementary material for: A 32 kb Critical Region Excluding Y402H in CFH Mediates Risk for Age-Related Macular Degeneration
Source: PLoS One. 2011 Oct 12;6(10):e25598. doi: 10.1371/journal.pone.0025598 (PMC3192039; doi:10.1371/journal.pone.0025598)
Supplement: Table S8 — Summary of SNP genotyping, genotype calling and quality control measures used in this study. (XLS) [file pone.0025598.s019.xls]

## Sheet: Sheet1
Table S8. Summary of SNP genotyping, genotype calling and quality control measures used in this study
	Genome-wide Association Study						Custom Genotyping
	FARMS	AREDS		MPM Panel	Indian	SIMES	BDES	AREDS	CCF	VAMC	OHSU
Data type	Familial	Case-control		Case-control	Case-control	Case-control	Case-control	Case-control	Case-control	Case-control	Case-control
Sample Size-original	294	400-200		2157-1150	134-117	172-2888	277-1086	478-99	655-306	120-243	410-221
Array Type	Affy. SNP 5.0	Affy 100K Nsp	Illumina 100K	Illumina 300	Affy 250K Nsp	Illumina 610K	Goldengate1	Goldengate1	Goldengate1	Goldengate1	Goldengate1
Number of SNPs at CFH region	58 (500,568)	29 (116,204)	37 (109,000)	37 (317,000)	33 (262,000)	40 (620,901)	258 (768)	258 (768)	258 (768)	258 (768)	258 (768)
Genotypes Calling	BRLMM-P	BRLMM	Bead Studio	Bead Studio	BRLMM	Bead Studio	Bead Studio	Bead Studio	Bead Studio	Bead Studio	Bead Studio
Imputation	NA3	MACH	MACH	MACH	NA3	NA3	MACH	MACH	MACH	MACH	MACH
Quality Threshold
Individual call rate	0.95	0.9	0.9	0.9	0.9	0.9	0.9	0.9	0.9	0.9	0.9
SNP call rate	0.85	0.9	0.9	0.9	0.9	0.9	0.9	0.9	0.9	0.9	0.9
Minor allele frequency	0.05	0.05	0.05	-	0.05	-	0.05	0.05	0.05	0.05	0.05
Population Stratification	NA3	Yes4	Yes4	NA3	NA3	Yes4	NA3	NA3	NA3	NA3	NA3
p-HWE2	NA3	1.0 x 10-15	1.0 x 10-15	-	1.0 x 10-15	1.0 x 10-6	1.0 x 10-4	1.0 x 10-4	1.0 x 10-4	1.0 x 10-4	1.0 x 10-4
Association Analysis
Samples size-Final	293	346-167	391-188	1919-11505	134-117	140-2390	248-1032	473-98	652-301	120-241	407-219
Covariates used	Age, Age2	Age	Age	Age, Sex	Age,smoking, PC17	Sex, Smoke	Age, Sex	Age, Sex	Age, Sex	Age, Sex	Age, Sex
1GoldenGate custom illumina Panel
2Hardy-Weinberg equilibrium p-value cutoff
3Not applicable
4Individuals belong to other races were excluded
5AREDS samples that are genotyped in AREDS GWAS and custom Illumina panel were excluded
6Individuals removed due to low call rate
7Pricipal component 1
